# Supplementary material
Source: Springer Nature journal article supplement (https://www.springermedizin.de/resource/supplementary/12885_2013_4262_MOESM5_ESM.pdf/9466544)

**A**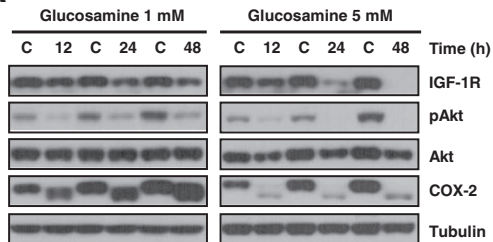**B**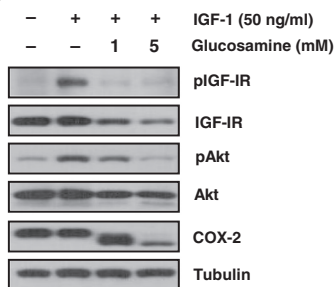**C**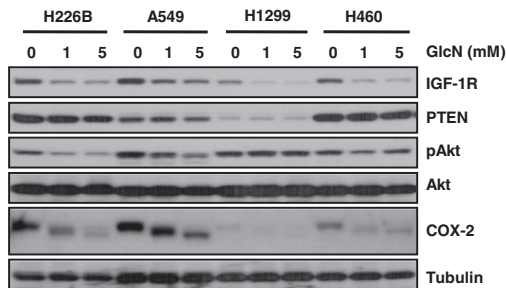**D**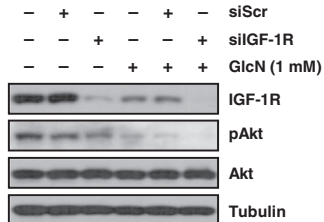**E**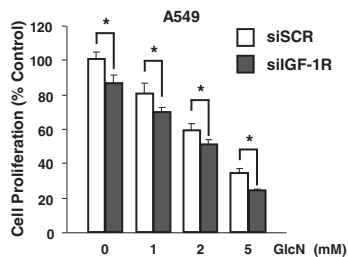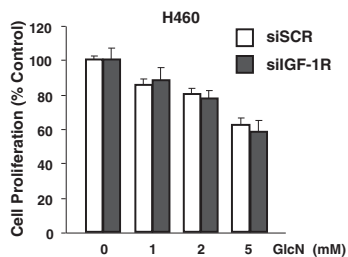

Supplement: MOESM5 [file 9466544]
